# Supplementary material
Source: publisher site journal article supplement (https://www.dovepress.com/article/479398)
Supplement: Supplementary file 1 [file get_supplementary_file.php]

Appendix

1. Search strategy

| **Databases** | **Search Strategy** | **No.of records** |
| --- | --- | --- |
| MEDLINE (PubMed) | (((((("Asthma"[Mesh])(Asthmas[Title/Abstract]))(Bronchial Asthma[Title/Abstract]))(Asthma,Bronchial[Title/Abstract]))(Breathing  Exercises[Title/Abstract]))AND(((((((("BreathingExercises"[Mesh])(Exercise,Breathing[Title/Abstract]))(RespiratoryMuscleTraining[Title/Abstract]))(MuscleTraining,Respiratory[Title/Abstract]))(Training,RespiratoryMuscle[Title/Abstract]))(inspiratorymuscletraining[Title/Abstract]))(thresholdtraining[Title/Abstract]))(thresholdtrainingofinspiratorymuscles[Title/Abstract])))AND(((((((((((((((((("Adolescent"[Mesh]) (Adolescents[Title/Abstract]))(Adolescence[Title/Abstract]))(Teens[Title/Abstract]))(Teen[Title/Abstract]))(Teenagers[Title/Abstract]))  (Teenager[Title/Abstract]))(Youth[Title/Abstract]))(Youths[Title/Abstract]))(Adolescents,Female[Title/Abstract]))(Adolescent,Female[Title/Abstract]))(FemaleAdolescent[Title/Abstract]))(FemaleAdolescents[Title/Abstract]))(Adolescents,Male[Title/Abstract]))(Adolescent, Male[Title/Abstract]))(MaleAdolescent[Title/Abstract]))(MaleAdolescents[Title/Abstract]))((("Child"[Mesh])(children[Title/Abstract]))(kid[Title/Abstract]))) | 220 |
| Webof science | Search: #4 AND #5 and Preprint Citation Index (Exclude – Database)  Search: randomized Controlled Trial (Topic) OR Clinical Trial (Topic) OR Intervention Study (Topic) OR Randomized (Topic) OR Placebo (Topic) OR Random (Topic) OR randomised (Topic) and Preprint Citation Index (Exclude – Database)  Search: #1 AND #2 AND #3 and Preprint Citation Index (Exclude – Database)  Search: Breathing Exercises (Topic) OR Exercise, Breathing (Topic) OR Respiratory Muscle Training (Topic) OR Muscle Training, Respiratory (Topic) OR Training, Respiratory Muscle (Topic) OR inspiratory muscle training (Topic) OR threshold training (Topic) OR threshold training of inspiratory muscles (Topic) and Preprint Citation Index (Exclude – Database)  Search: Child (Topic) OR children (Topic) OR kid (Topic) OR kids (Topic) OR Adolescent (Topic) OR Adolescents (Topic) OR Adolescence (Topic) OR Teens (Topic) OR Teen (Topic) OR Teenagers (Topic) OR Teenager (Topic) OR Youth (Topic) OR Youths (Topic) OR Adolescents, Female (Topic) OR Adolescent, Female (Topic) OR Female Adolescent (Topic) OR Female Adolescents (Topic) OR Adolescents, Male (Topic) OR Adolescent, Male (Topic) OR Male Adolescent (Topic) OR Male Adolescents (Topic) and Preprint Citation Index (Exclude – Database)  Search: asthma (Topic) OR Asthmas (Topic) OR Bronchial Asthma (Topic) OR Asthma, Bronchial (Topic) and Preprint Citation Index (Exclude – Database) | 229 |
| Embase | #14. ('asthma'/exp OR ('asthma bronchiale' OR 'asthma  pulmonale' OR 'asthma, bronchial' OR 'asthmatic'  OR 'asthmatic subject' OR 'bronchial asthma' OR  'bronchus asthma' OR 'childhood asthma' OR  'chronic asthma' OR 'lung allergy' OR 'asthma'))  AND ('breathing exercise'/exp OR ('breathing  exercises' OR 'breathing therapy' OR 'chest  physical therapy' OR 'chest physiotherapy' OR  'exercise, breathing' OR 'exercise, respiratory'  OR 'respiration exercise' OR 'respiration  therapy' OR 'respiratory exercise' OR  'respiratory physiotherapy' OR 'breathing  exercise') OR (respiratory AND muscle AND  training OR (muscle AND training, AND  respiratory) OR (training, AND respiratory AND  muscle) OR (inspiratory AND muscle AND training)  OR (threshold AND training) OR (threshold AND  training AND of AND inspiratory AND muscles)))  AND ('child'/exp OR ('children' OR 'child') OR  'adolescent'/exp OR ('teenager' OR 'adolescent')  OR (adolescents OR adolescence OR teens OR teen  OR teenagers OR youth OR youths OR kid OR kids OR  (female AND adolescent) OR (female AND  adolescents) OR (adolescents, AND female) OR  (adolescent, AND female)))  #13. 'child'/exp OR ('children' OR 'child') OR  'adolescent'/exp OR ('teenager' OR 'adolescent')  OR (adolescents OR adolescence OR teens OR teen  OR teenagers OR youth OR youths OR kid OR kids OR  (female AND adolescent) OR (female AND  adolescents) OR (adolescents, AND female) OR  (adolescent, AND female))  #12. adolescents OR adolescence OR teens OR teen OR  teenagers OR youth OR youths OR kid OR kids OR  (female AND adolescent) OR (female AND  adolescents) OR (adolescents, AND female) OR  (adolescent, AND female)  #11. 'teenager' OR 'adolescent'  #10. 'adolescent'/exp  #9. 'children' OR 'child'  #8. 'child'/exp  #7. 'breathing exercise'/exp OR ('breathing  exercises' OR 'breathing therapy' OR 'chest  physical therapy' OR 'chest physiotherapy' OR  'exercise, breathing' OR 'exercise, respiratory'  OR 'respiration exercise' OR 'respiration  therapy' OR 'respiratory exercise' OR  'respiratory physiotherapy' OR 'breathing  exercise') OR (respiratory AND muscle AND  training OR (muscle AND training, AND  respiratory) OR (training, AND respiratory AND  muscle) OR (inspiratory AND muscle AND training)  OR (threshold AND training) OR (threshold AND  training AND of AND inspiratory AND muscles))  #6. 'asthma'/exp OR ('asthma bronchiale' OR 'asthma  pulmonale' OR 'asthma, bronchial' OR 'asthmatic'  OR 'asthmatic subject' OR 'bronchial asthma' OR  'bronchus asthma' OR 'childhood asthma' OR  'chronic asthma' OR 'lung allergy' OR 'asthma')  #5. respiratory AND muscle AND training OR (muscle  AND training, AND respiratory) OR (training, AND  respiratory AND muscle) OR (inspiratory AND  muscle AND training) OR (threshold AND training)  OR (threshold AND training AND of AND inspiratory  AND muscles)  #4. 'breathing exercises' OR 'breathing therapy' OR  'chest physical therapy' OR 'chest physiotherapy'  OR 'exercise, breathing' OR 'exercise,  respiratory' OR 'respiration exercise' OR  'respiration therapy' OR 'respiratory exercise'  OR 'respiratory physiotherapy' OR 'breathing  exercise'  #3. 'breathing exercise'/exp  #2. 'asthma bronchiale' OR 'asthma pulmonale' OR  'asthma, bronchial' OR 'asthmatic' OR 'asthmatic  subject' OR 'bronchial asthma' OR 'bronchus  asthma' OR 'childhood asthma' OR 'chronic asthma'  OR 'lung allergy' OR 'asthma'  #1. 'asthma'/exp | 582 |
| CINAHL | S1 (MH "Asthma") Expanders - Apply equivalent subjects  Search modes - Boolean/Phrase Interface - EBSCOhost Research Databases  Search Screen - Advanced Search  Database - CINAHL Complete 37,535  S2 SU Asthmas OR SU Asthmas OR SU Bronchial Asthma OR SU Asthma, Bronchial Expanders - Apply equivalent subjects  Search modes - Boolean/Phrase Interface - EBSCOhost Research Databases  Search Screen - Advanced Search  Database - CINAHL Complete 38,144  S3 (MH "Breathing Exercises") Expanders - Apply equivalent subjects  Search modes - Boolean/Phrase Interface - EBSCOhost Research Databases  Search Screen - Advanced Search  Database - CINAHL Complete 3,088  S4 SU Exercise, Breathing OR SU Respiratory Muscle Training OR SU Muscle Training, Respiratory OR SU Training, Respiratory Muscle OR SU inspiratory muscle training OR threshold training OR threshold training of inspiratory muscles Expanders - Apply equivalent subjects  Search modes - Boolean/Phrase Interface - EBSCOhost Research Databases  Search Screen - Advanced Search  Database - CINAHL Complete 3,452  S5 S1 OR S2 Expanders - Apply equivalent subjects  Search modes - Boolean/Phrase Interface - EBSCOhost Research Databases  Search Screen - Advanced Search  Database - CINAHL Complete 38,144  S6 S3 OR S4 Expanders - Apply equivalent subjects  Search modes - Boolean/Phrase Interface - EBSCOhost Research Databases  Search Screen - Advanced Search  Database - CINAHL Complete 3,452  S7 (MH "Child") Expanders - Apply equivalent subjects  Search modes - Boolean/Phrase Interface - EBSCOhost Research Databases  Search Screen - Advanced Search  Database - CINAHL Complete 535,136  S8 SU children OR SU kid OR SU kids Expanders - Apply equivalent subjects  Search modes - Boolean/Phrase Interface - EBSCOhost Research Databases  Search Screen - Advanced Search  Database - CINAHL Complete 685,261  S9 (MH "Adolescence") Expanders - Apply equivalent subjects  Search modes - Boolean/Phrase Interface - EBSCOhost Research Databases  Search Screen - Advanced Search  Database - CINAHL Complete 617,451  S10 SU Adolescent OR SU Adolescents OR SU Teens OR SU Teen OR SU Teenagers OR SU Teenager OR SU Youth OR SU Youths OR SU Female Adolescent OR SU Female Adolescents OR SU Male Adolescent OR SU Male Adolescents Expanders - Apply equivalent subjects  Search modes - Boolean/Phrase Interface - EBSCOhost Research Databases  Search Screen - Advanced Search  Database - CINAHL Complete 42,881  S11 S7 OR S8 OR S9 OR S10 Expanders - Apply equivalent subjects  Search modes - Boolean/Phrase Interface - EBSCOhost Research Databases  Search Screen - Advanced Search  Database - CINAHL Complete 1,047,686  S12 S5 AND S6 AND S11 Expanders - Apply equivalent subjects  Search modes - Boolean/Phrase Interface - EBSCOhost Research Databases  Search Screen - Advanced Search  Database - CINAHL Complete 30 | 30 |
| Cochrane Library | #1 MeSH descriptor: [Asthma] explode all trees 15016  #2 (Asthma or Bronchial or Bronchial Asthma or Asthmas):ti,ab,kw (Word variations have been searched) 39270  #3 #1 AND #2 15008  #4 (Training, Respiratory Muscle or Respiratory Muscle Training or Muscle Training, Respiratory or Exercise, Breathing or inspiratory muscle training or threshold training or threshold training of inspiratory muscles):ti,ab,kw (Word variations have been searched) 15107  #5 MeSH descriptor: [Breathing Exercises] explode all trees 1336  #6 MeSH descriptor: [Child] explode all trees 81477  #7 (children or kid):ti,ab,kw (Word variations have been searched) 186988  #8 MeSH descriptor: [Adolescent] explode all trees 136503  #9 (Adolescents or Adolescence or Teens or Teen or Teenagers or Teenager or Youth or Youths or Adolescents, Female or Adolescent, Female or Female Adolescent or Female Adolescents or Adolescents, Male or Adolescent, Male or Male Adolescent or Male Adolescents or):ti,ab,kw (Word variations have been searched) 0  #10 #1 or #2 39278  #11 #4 or #5 15237  #12 #6 or #7 or #8 or #9 2134319  #13 #10 AND #11 AND #12 700 | 700 |
| CNKI | （主题：哮喘 + 支气管哮喘 + 喘息）AND（主题：呼吸训练 + 呼吸肌训练 + 吸气肌训练 + 阈值压力吸气肌负荷训练 +阈值压力训练 + 阈值压力负荷训练器 ）AND（主题：儿童 + 患儿 + 小儿 + 青少年） | 30 |
| Wan fang | 主题:(哮喘 OR 支气管哮喘 OR 喘息) and 主题:(呼吸训练 OR 呼吸肌训练 OR 吸气肌训练 OR 阈值压力吸气肌训练 OR 阈值压力吸气肌负荷训练 OR 阈值压力负荷训练器 ) and 主题:(儿童 OR 患儿 OR 小儿 OR 青少年) | 29 |
| VIP | ((((任意字段=哮喘 OR 任意字段=支气管哮喘) OR 任意字段=喘息) AND (((任意字段=儿童 OR 任意字段=患儿) OR 任意字段=小儿) OR 任意字段=青少年)) AND (((((任意字段=呼吸训练 OR 任意字段=呼吸肌训练) OR 任意字段=吸气肌训练) OR 任意字段=阈值压力吸气肌训练) OR 任意字段=阈值压力吸气肌负荷训练) OR 任意字段=阈值压力负荷训练器)) | 38 |
| SinoMed | ("呼吸肌训练"[常用字段:智能] OR "呼吸训练"[常用字段:智能] OR "吸气肌训练"[常用字段:智能] OR "阈值压力吸气肌训练"[常用字段:智能] OR "阈值压力吸气肌负荷训练"[常用字段:智能] OR "阈值压力负荷训练器"[常用字段:智能]) AND ("儿童"[常用字段:智能] OR "小儿"[常用字段:智能] OR "患儿"[常用字段:智能] OR "青少年"[常用字段:智能]) AND ("哮喘"[常用字段:智能] OR "支气管哮喘"[常用字段:智能] OR "喘息"[常用字段:智能]) | 20 |

**PRISMA-S Checklist**

| **Section/topic** | **#** | **Checklist item** | **Location(s) Reported** |
| --- | --- | --- | --- |
| **INFORMATION SOURCES AND METHODS** | | | |
| Database name | 1 | Name each individual database searched, stating the platform for each. | Page 6 |
| Multi-database searching | 2 | If databases were searched simultaneously on a single platform, state the name of the platform, listing all of the databases searched. | NA |
| Study registries | 3 | List any study registries searched. | NA |
| Online resources and browsing | 4 | Describe any online or print source purposefully searched or browsed (e.g., tables of contents, print conference proceedings, web sites), and how this was done. | Figure 1. |
| Citation searching | 5 | Indicate whether cited references or citing references were examined, and describe any methods used for locating cited/citing references (e.g., browsing reference lists, using a citation index, setting up email alerts for references citing included studies). | NA |
| Contacts | 6 | Indicate whether additional studies or data were sought by contacting authors, experts, manufacturers, or others. | NA |
| Other methods | 7 | Describe any additional information sources or search methods used. | NA |
| **SEARCH STRATEGIES** | | | |
| Full search strategies | 8 | Include the search strategies for each database and information source, copied and pasted exactly as run. | Page 2-9 (Supplementary file) |
| Limits and restrictions | 9 | Specify that no limits were used, or describe any limits or restrictions applied to a search (e.g., date or time period, language, study design) and provide justification for their use. | Page 6 |
| Search filters | 10 | Indicate whether published search filters were used (as originally designed or modified), and if so, cite the filter(s) used. | NA |
| Prior work | 11 | Indicate when search strategies from other literature reviews were adapted or reused for a substantive part or all of the search, citing the previous review(s). | NA |
| Updates | 12 | Report the methods used to update the search(es) (e.g., rerunning searches, email alerts). | NA |
| Dates of searches | 13 | For each search strategy, provide the date when the last search occurred. | Page 6 |
| **PEER REVIEW** | | | |
| Peer review | 14 | Describe any search peer review process. | NA |
| **MANAGING RECORDS** | | | |
| Total Records | 15 | Document the total number of records identified from each database and other information sources. | Figure 1. |
| Deduplication | 16 | Describe the processes and any software used to deduplicate records from multiple database searches and other information sources. | Figure 1 |
|  |  |  |  |
| PRISMA-S: An Extension to the PRISMA Statement for Reporting Literature Searches in Systematic Reviews | | |  |
| Rethlefsen ML, Kirtley S, Waffenschmidt S, Ayala AP, Moher D, Page MJ, Koffel JB, PRISMA-S Group. | | |  |
| Last updated February 27, 2020. | |  |  |
